# Supplementary material
Source: publisher site journal article supplement (https://www.degruyterbrill.com/publication/isbn/9783110340259/downloadAsset/9783110340259_Zusatzmaterial.pdf)
Supplement: Supplementary file 1 [file 9783110340259_Zusatzmaterial.pdf]

# 1 Online-Zusatzmaterialien

## 1.1 Datentypen und Datenstrukturen

---

### ***Weiterführende Literatur***

*IEEE 754-2008: Standard for Floating-Point Arithmetic, IEEE Standards Association, 2008.*

*The Unicode Consortium. The Unicode Standard, Version 5.0. Boston, MA, Addison-Wesley, 2007.*

*Java Platform. Standard Edition (Java SE) 8 Documentation, 2014.*

*Ernst H. Grundkurs Informatik. Wiesbaden, Germany, Vieweg & Teubner, 2008*

*Cormen, TH, Leiserson CE, Rivest RL, Stein, C. Introduction to Algorithms (3rd edition). Cambridge, The Mit Press, 2009.*

*Harris S, Ross J. Beginning Algorithms. Indianapolis, IN, Wrox, 2005.*

## 1.2 Modelle und Algorithmen

### Bubblesort

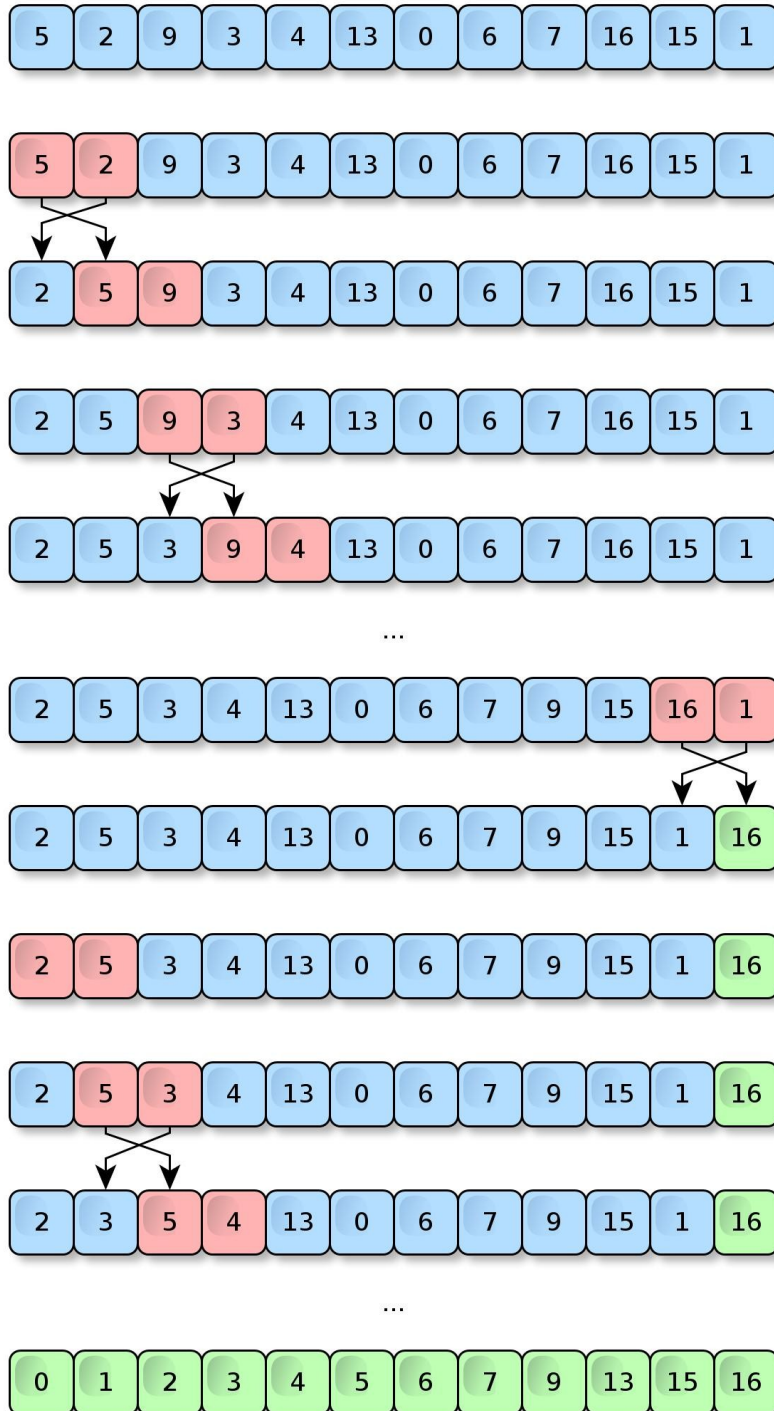

Abb. 1 Visualisierung von Bubblesort anhand eines Beispiels: Jede Zeile korrespondiert mit einer Iteration des Algorithmus. Rote Elemente werden von im aktuellen Schritt von Bubblesort betrachtet, grüne Elemente sind korrekt einsortiert

Insertionsort

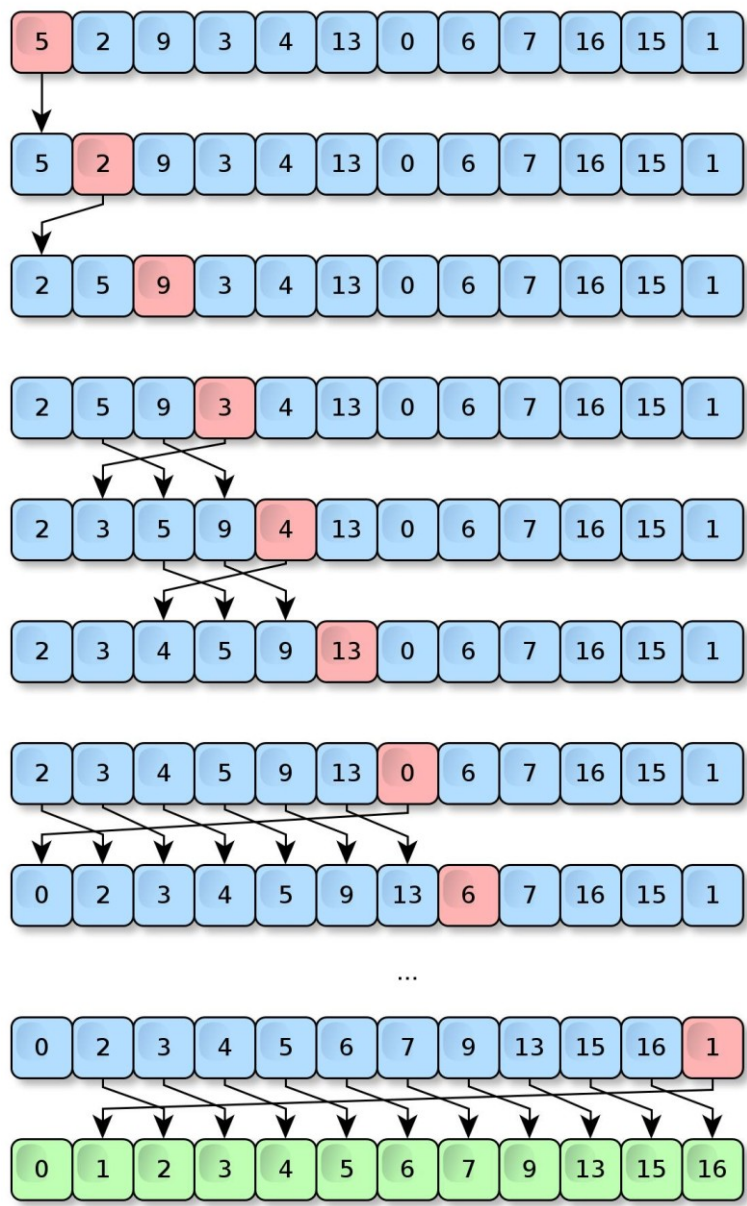

Abb. 2 Visualisierung von Insertionsort anhand eines Beispiels: Jede Zeile korrespondiert mit einer Iteration des Algorithmus. Rote Elemente werden von Insertionsort im aktuellen Schritt betrachtet, grüne Elemente sind korrekt einsortiert

# Selectionsort

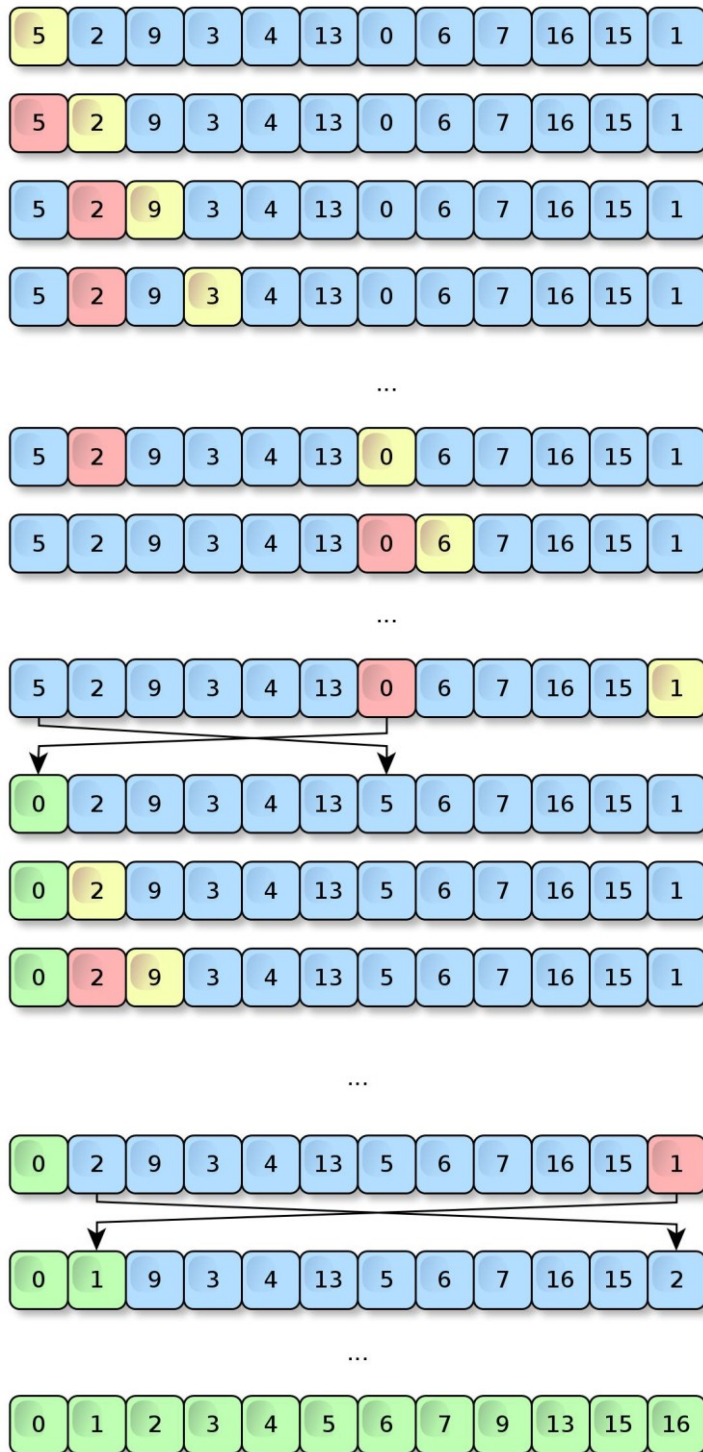

Abb. 3 Visualisierung von Selectionsort anhand eines Beispiels: Jede Zeile korrespondiert mit einer Iteration des Algorithmus. Das **gelbe** Element jedes Schritts ist das aktuell betrachtete. Das **rote** Element ist das bisher kleinste gefundene. **Grüne** Elemente sind korrekt einsortiert

# Quicksort

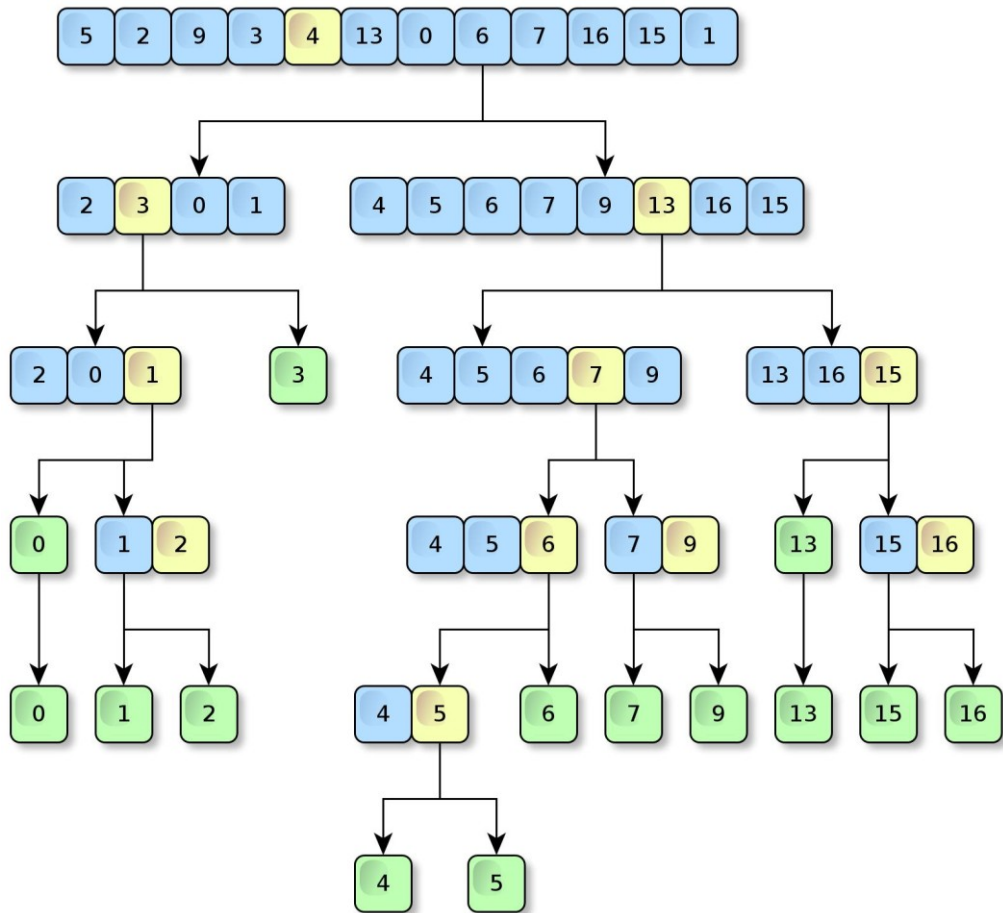

Abb. 4 Visualisierung von Quicksort anhand eines Beispiels: Jede Zeile korrespondiert mit einer Rekursionstiefe des Algorithmus. Gelbe Elemente sind die Pivotelemente, grüne Elemente sind korrekt einsortiert

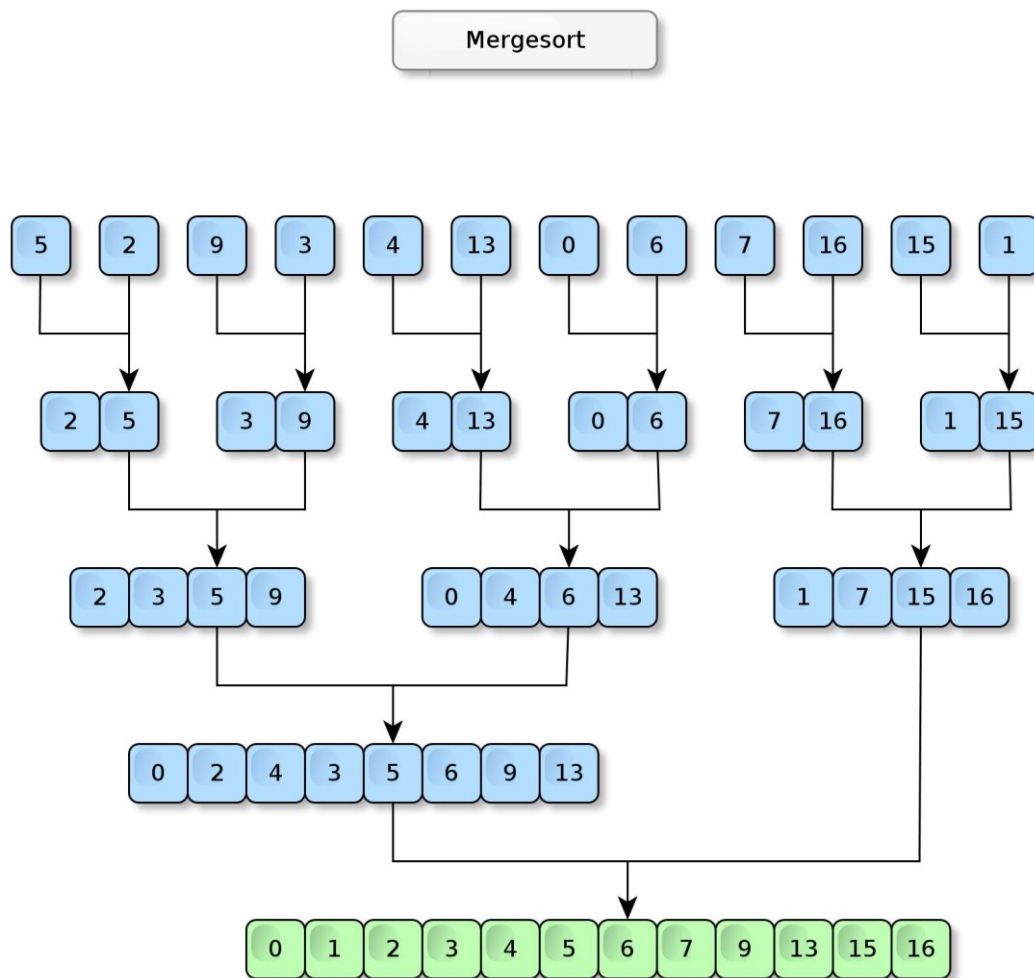

Abb. 5 Visualisierung von Mergesort anhand eines Beispiels

### Weiterführende Literatur

Harris S, Ross J. *Beginning Algorithms*. Indianapolis, IN, Wrox, 2005.

Cormen, TH, Leiserson CE, Rivest RL, Stein, C. *Introduction to Algorithms (3rd edition)*. Cambridge, The Mit Press, 2009.

UML Superstructure Specification, v2.4.1 . 2011.

## 1.3 Einführung in die objektorientierte Programmierung mit Java

### Weiterführende Literatur

Java Platform. *Standard Edition (Java SE) 8 Documentation*, 2014.

Ullenboom C. *Java ist auch eine Insel: Das umfassende Handbuch (10. Auflage)*. Bonn, Galileo Computing, 2011.

Heinisch C, Müller-Hofmann F, Goll J: *Java als erste Programmiersprache – Vom Einsteiger zum Profi (6. Auflage)*. Vieweg+Teubner, 2010.

Java Code Conventions. Sun Microsystems, 1997.

## 1.4 Gesundheitsökonomie

OECD Health Data 2010, OECD: <http://stats.oecd.org/>.

Statistisches Bundesamt:

<https://www.destatis.de/DE/ZahlenFakten/GesellschaftStaat/Gesundheit/Gesundheit.html;jsessionid=0F5F20FB0D8FA91587CD42AE16F21DE7.cae4>

Lemons-Problem (Nobelpreis für Wirtschaftswissenschaften 2001): The Market for "Lemons": von George A. Akerlof: Quality Uncertainty and the Market Mechanism. Quarterly Journal of Economics (84/3), 488-500 (1970).

<https://www.iei.liu.se/nek/730g83/artiklar/1.328833/AkerlofMarketforLemons.pdf>

Daten des Gesundheitswesens des BMG von 2013:

[https://www.bundesgesundheitsministerium.de/fileadmin/dateien/Publikationen/Gesundheit/Broschueren/Daten\\_des\\_Gesundheitswesens\\_2013.pdf](https://www.bundesgesundheitsministerium.de/fileadmin/dateien/Publikationen/Gesundheit/Broschueren/Daten_des_Gesundheitswesens_2013.pdf)

Zahlen des GKV-Spitzenverbands:

[http://www.gkv-](http://www.gkv-spitzenverband.de/media/grafiken/gkv_kennzahlen/kennzahlen_gkv_2014_q1/160_dpi/GKV-Kennzahlen_Krankenkassen_2014_160.jpg)

[spitzenverband.de/media/grafiken/gkv\\_kennzahlen/kennzahlen\\_gkv\\_2014\\_q1/160\\_dpi/GKV-Kennzahlen\\_Krankenkassen\\_2014\\_160.jpg](http://www.gkv-spitzenverband.de/media/grafiken/gkv_kennzahlen/kennzahlen_gkv_2014_q1/160_dpi/GKV-Kennzahlen_Krankenkassen_2014_160.jpg)

[http://www.gkv-](http://www.gkv-spitzenverband.de/media/grafiken/gkv_kennzahlen/kennzahlen_gkv_2014_q1/160_dpi/GKV-Kennzahlen_VersicherteSystem_Mio_160.jpg)

[spitzenverband.de/media/grafiken/gkv\\_kennzahlen/kennzahlen\\_gkv\\_2014\\_q1/160\\_dpi/GKV-Kennzahlen\\_VersicherteSystem\\_Mio\\_160.jpg](http://www.gkv-spitzenverband.de/media/grafiken/gkv_kennzahlen/kennzahlen_gkv_2014_q1/160_dpi/GKV-Kennzahlen_VersicherteSystem_Mio_160.jpg)

Gesamtverband der Deutschen Versicherungswirtschaft zu Privaten Krankenversicherungen:

<https://www.pkv.de/verband/>

Medizinischer Dienst der Krankenkassen: <http://www.mdk.de>

Robert Koch Institut: <http://www.rki.de>

Paul Ehrlich Gesellschaft: <http://www.p-e-g.org/>

Deutsches Institut für Medizinische Dokumentation und Information: [DIMDI](http://www.dimdi.de)

Bundesärztekammer: <http://www.bundesaerztekammer.de>

[Kassenärztlichen Bundesvereinigung](http://www.kassenaerztlichen-bundesvereinigung.de)

IQWiG: <http://www.iqwig.de>

InEK (Institut für Entgeltsystem im Krankenhaus): <http://www.g-drg.de/>

Daten zum Gesundheitswesen 2013 des Bundesministeriums für Gesundheit:

[https://www.bundesgesundheitsministerium.de/fileadmin/dateien/Publikationen/Gesundheit/Broschueren/Daten\\_des\\_Gesundheitswesens\\_2013.pdf](https://www.bundesgesundheitsministerium.de/fileadmin/dateien/Publikationen/Gesundheit/Broschueren/Daten_des_Gesundheitswesens_2013.pdf)

Statistisches Bundesamt - Krankenhausdaten sowie BMG:

[https://www.bundesgesundheitsministerium.de/fileadmin/dateien/Publikationen/Gesundheit/Broschueren/Daten\\_des\\_Gesundheitswesens\\_2013.pdf](https://www.bundesgesundheitsministerium.de/fileadmin/dateien/Publikationen/Gesundheit/Broschueren/Daten_des_Gesundheitswesens_2013.pdf)

Krankenhausstatistik 2012 der Deutschen Krankenhausgesellschaft:

[http://www.dkgev.de/media/file/15932.2014-02-](http://www.dkgev.de/media/file/15932.2014-02-11_Foliensatz_Krankenhausstatistik_aktuell.pdf)

[11\\_Foliensatz\\_Krankenhausstatistik\\_aktuell.pdf](http://www.dkgev.de/media/file/15932.2014-02-11_Foliensatz_Krankenhausstatistik_aktuell.pdf)



Angaben des BMG zu Ausgaben im deutschen Gesundheitssystem:

<http://www.bmg.bund.de/gesundheitsystem/gesundheitswirtschaft/gesundheitswirtschaft-im-ueberblick.html>

Versorgungsatlas des Zentralinstituts der Kassenärztlichen Versorgung:

[http://www.versorgungsatlas.de/fileadmin/ziva\\_docs/ID\\_14\\_Dok1\\_Bericht.pdf](http://www.versorgungsatlas.de/fileadmin/ziva_docs/ID_14_Dok1_Bericht.pdf)

Gesetzliche Veränderungsrate: [http://www.gkv-](http://www.gkv-spitzenverband.de/krankenversicherung/krankenhaeuser/budgetverhandlungen/gl_veraenderungsrage/gl_veraenderungsrage.jsp)

[spitzenverband.de/krankenversicherung/krankenhaeuser/budgetverhandlungen/gl\\_veraenderungsrage/gl\\_veraenderungsrage.jsp](http://www.gkv-spitzenverband.de/krankenversicherung/krankenhaeuser/budgetverhandlungen/gl_veraenderungsrage/gl_veraenderungsrage.jsp)

Deutsches Krankenhausinstitut zu Fallzahlen und Case Mix Index: Angaben des Deutschen Krankenhausinstituts

[http://www.dki.de/sites/default/files/publikationen/einflussfaktoren\\_des\\_fallzahl-\\_und\\_case\\_mix-anstiegs\\_in\\_deutschen\\_krankenhaeusern.pdf](http://www.dki.de/sites/default/files/publikationen/einflussfaktoren_des_fallzahl-_und_case_mix-anstiegs_in_deutschen_krankenhaeusern.pdf)

Übersicht über die Landesbasisfallwerte

<http://www.vdek.com/vertragspartner/Krankenhaeuser/landesbasisfallwerte.html>

Verbandes der forschenden Arzneimittelhersteller (VfA) <http://www.vfa.de/de/arzneimittelforschung/so-funktioniert-pharmaforschung/so-entsteht-ein-medikament.html>

Nutzenbewertung des gemeinsamen Bundesausschusses (G-BA): <https://www.g-ba.de/informationen/nutzenbewertung/>

---

### **Weiterführende Literatur:**

*Fleßa S, Greiner W: Grundlagen der Gesundheitsökonomie, Springer-Verlag 2013.*

*Schwabe, Ulrich / Paffrath, Dieter (Hrsg): Arzneimittelverordnungs-Report 2013, Berlin/Heidelberg 2013-Glossar zur Gesundheitsreform? <http://www.die-gesundheitsreform.de/glossar>*

*IGES/Lauterbach/Wasem: Klassifikationsmodelle für Versicherte im Risikostrukturausgleich (Untersuchung im Auftrag des BMG, Endbericht):*

[http://www.iges.de/e1788/e4230/e5692/index\\_ger.html](http://www.iges.de/e1788/e4230/e5692/index_ger.html)

*Statistisches Bundesamt: <http://www.destatis.de/>*



## 1.5 Qualitätsmanagement

Ärztliches Zentrum für Qualität: <http://www.azq.de/>

Bundesgeschäftsstelle QS: <http://www.bqs-online.de/>

Kooperation für Transparenz und Qualität: <http://www.ktq.de/>

Deutsche Akkreditierungsstelle (DAkkS): <http://www.dakks.de/>

AQUA-Institut: <http://www.aqua-institut.de/>

Homepage der Sektorenübergreifende Qualität im Gesundheitswesen: <http://www.sgq.de/>

Richtlinie über Maßnahmen der Qualitätssicherung in Krankenhäusern – QSKH-RL des G-BA:  
[https://www.g-ba.de/downloads/62-492-790/QSKH-RL\\_2013-06-20.pdf](https://www.g-ba.de/downloads/62-492-790/QSKH-RL_2013-06-20.pdf)

---

### **Weiterführende Literatur:**

*Heike Anette Kahla-Witzsch: Praxiswissen Qualitätsmanagement im Krankenhaus: Hilfen zur Vorbereitung und Umsetzung. Kohlhammer Verlag, Stuttgart, 2. Auflage, 2009.*

*Lauterbach/Lüngen/Schrapp: Gesundheitsökonomie, Management und Evidence based medicine: Handbuch für Praxis, Politik und Studium. Schattauer Verlag, Stuttgart, 3. Auflage, 2010.*

*Ulrich Paschen: Die Gute Hospital-Praxis 2011: Ein Qualitätsmanagement-System für das ganze Krankenhaus. Books on Demand GmbH, IQ Institut für Qualitäts-Systeme in der Medizin und Wissenschaft, Hamburg, 2. Auflage, 2011.*

*Bettina Hahne: Qualitätsmanagement im Krankenhaus: Konzepte, Methoden, Implementierungshilfen. Symposion Publishing GmbH, Düsseldorf, 2011.*

*Herbert Rebscher/Stefan Kaufmann (Hrsg.): Qualitätsmanagement in Gesundheitssystemen (Gesundheitsmarkt in der Praxis). Deutsch-Schweizerische Gesellschaft für Gesundheitspolitik (DSGG), medhochzwei Verlag GmbH, Heidelberg, 2011.*

---

### **Links:**

<http://www.aktionsbuendnis-patientensicherheit.de/>

<http://www.gqmg.de/>

<http://www.qm-boerchers.de/>

## 1.6 Statistik

### 1.6.1 Softwareempfehlungen (Auswahl)

<http://www-01.ibm.com/software/de/stats22/>; geprüft 11/2014

<http://www.ibm.com/de/de/>; geprüft 11/2014

[http://www.sas.com/de\\_de/software/analytics.html#statistische-analysen](http://www.sas.com/de_de/software/analytics.html#statistische-analysen); geprüft 11/2014

[http://www.sas.com/de\\_de/software/analytics/analytics-pro.html](http://www.sas.com/de_de/software/analytics/analytics-pro.html); geprüft 11/2014

<http://www.stata.com>; geprüft 11/2014

<http://www.r-project.org>; geprüft 11/2014

<http://www.gpower.hhu.de>; geprüft 11/2014

### 1.6.2 Diagramme:

Beispiele:

[http://wikis.zum.de/dsd/Diagrammarten\\_und\\_ihre\\_Bedeutung](http://wikis.zum.de/dsd/Diagrammarten_und_ihre_Bedeutung); geprüft 11/2014

### 1.6.3 Klassierte Daten

Bei großen Datenerhebungen, wie sie bei medizinischen Studien häufig sind, ist die Darstellung aller einzelnen Merkmalsausprägungen  $x_i$  unübersichtlich. Daher fasst man Bereiche von Merkmalsausprägungen in **Klassen** zusammen.

Für die Merkmalsausprägungen von  $k-1$  bis  $k$  ist die Klasse  $x_k = x_{k-1} \leq X \leq x_k$

Definitionen

Eine Klasse wird eindeutig entweder durch Klassenmitte und -breite oder durch eine untere und obere **Klassengrenze** bestimmt; eine Merkmalsausprägung  $x_i$  gehört genau einer Klasse an. Soll eine Klasse den angegebenen Grenzwert enthalten, so wird dies mit eckigen Klammern notiert [], soll die Klassengrenze nicht in der angegebenen Klasse liegen, so wird dies mit runden Klammern angegeben.

Berechnungen mit klassierten Daten sind:

#### **absolute Klassenhäufigkeit**

$$n_k = n(x_{k-1} \leq X \leq x_k)$$

#### **relative Klassenhäufigkeit**

$$h_k = n_k/n$$

#### **Klassenbreite**

$$b_k = x_k - x_{k-1} \text{ (Differenz der oberen und unteren Klassengrenze)}$$

#### **Klassenmitte**

$$m_k = \frac{1}{2} (x_k + x_{k-1})$$

In einer Untersuchung kann die Klassenbreite und damit Anzahl der Klassen frei festgelegt werden, da es keine formalen Kriterien für die Anzahl der Klassen gibt. In der Regel werden meist 5 bis 20 äquidistante Klassen gebildet mit einer Klassenbreite von  $p \sim \sqrt{n}$  oder  $\log_{10}(n)$ .

Berechnungen mit klassierten Daten

Zur Bestimmung von **Quantilen** von klassierten Daten wird zunächst die Klasse gesucht, in der das p-Quantil liegt und diese Klasse dann nach p gewichtet geteilt.

Das p-Quantil wird mit Hilfe der Summenhäufigkeit  $H(K_i)$  und der relativen Häufigkeit  $h(K_i)$  wie folgt berechnet (untere Klassengrenze  $x_{k-1}$ , Klassenbreite  $b_k$ ):

$$\tilde{x}_p = x_{k-1} + \frac{p - H(K_i)}{h(K_i)} \cdot b_k$$

Der **Modus** klassierter Daten ist die Klassenmitte der am dichtesten besetzten Klasse.

Das **arithmetische Mittel** wird als gewichtetes Mittel der Klassenmitten  $m_k$  aller Klassen  $K_1, \dots, K_n$  und der absoluten Häufigkeiten  $n_i$  berechnet:

$$\bar{x} = \sum_{i=1}^n n(K_i) \cdot m_k = \sum_{i=1}^n n(K_i) \cdot \frac{x_k + x_{k-1}}{2}$$

Die **Varianz** wird ebenfalls unter Verwendung der jeweiligen Klassenmitte  $m_k$  und deren Abweichung vom arithmetischen Mittelwert berechnet:

$$\text{Var}(X) = \sum_{k=1}^n (m_k - \bar{x})^2 \cdot h_k$$

#### 1.6.4 Korrelationen (und Kreuztabellen)

Kendall's Korrelationen:

Kendall, M. (1938). "A New Measure of Rank Correlation". *Biometrika* **30** (1-2): 81-89.

[doi:10.1093/biomet/30.1-2.81](https://doi.org/10.1093/biomet/30.1-2.81); geprüft 11/2014

Beispiele:

<http://www.youtube.com/watch?v=oXVxaSoY94k>; geprüft 11/2014

Tetra-und polychorische Korrelationen:

Auszug aus

Dorsch, Lexikon der Psychologie. 2014, 17. Auflage, Marcus Antonius Wirtz Hrsg., Huber, Bern:

<https://portal.hogrefe.com/dorsch/tetrachorische-korrelation/>; geprüft 11/2014

Brown, M.B. (1977) Algorithm AS 116: The tetrachoric correlation and its asymptotic standard error. *Applied Statistics*, 26, 343-351.

Digby, P.G. N. (1983). Approximating the tetrachoric correlation coefficient. *Biometrics*, 39, 753–757.

#### *Kreuztabelle*

Exakter Test nach Fisher:

[http://de.wikipedia.org/wiki/Exakter\\_Test\\_nach\\_Fisher](http://de.wikipedia.org/wiki/Exakter_Test_nach_Fisher); geprüft 11/2014

Mehta, C.R. and Patel, N.R. (1986) Algorithm 643. FEXACT: A Fortran subroutine for Fisher's exact test on unordered  $r \times c$  contingency tables. *ACM Transactions on Mathematical Software*, 12, 154–161.

---

#### **Weiterführende Literatur:**

*Altman DG, Machin D, Bryant TN, Gardner MJ: Statistics with Confidence (2nd edition). BMJ Books 2000.*

*Matthews DE, Farewell VT: Using and Understanding Medical Statistics (4. Auflage). Karger, 2008.*

*Armitage P, Berry G: Statistical Methods in Medical Research. Blackwell Science Inc 2001.*

*Bortz, Lienert: Kurzgefasste Statistik für die klinische Forschung, 3. Auflage 2008, Springer Verlag.*

*Grafische Datenanalyse*

*du Toit, S.H.C., Stein, A.G.W., Stumpf R.H. Graphical exploratory data analysis. 1986 Springer Texts in Statistic, Stephen Fienberg and Ingram Olkin Hrsg., Springer Verlag New York*

*Serie zur Bewertung wissenschaftlicher Publikationen im Deutschen Ärzteblatt:*

*z.B. Prel JD, Röhrig B, Blettner M: Teil 1 der Serie zur Bewertung wissenschaftlicher Publikationen - Kritisches Lesen wissenschaftlicher Artikel. DÄ 106: 100-5, 2009. DOI: 10.3238/arztebl.2009.0100; geprüft 11/2014*

## 1.7 Biosignalverarbeitung

Animation des Faltungsprodukts:

[http://commons.wikimedia.org/wiki/File:Convolution\\_Animation\\_%28Gaussian%29.gif](http://commons.wikimedia.org/wiki/File:Convolution_Animation_%28Gaussian%29.gif) ;

geprüft 11/2014

Software Fast Fourier Transformation (FFT): <http://www.fftw.org/index.html>; geprüft 11/2014

Links mit Verweisen zu anderen Seiten: <http://www.fftw.org/links.html> ; geprüft 11/2014

Alternativ: <http://www.jjj.de/fft/fftpage.html> ; geprüft 11/2014

Zur z-Transformation für diskrete Signale und zur korrespondierenden Laplace-Transformation für kontinuierliche Signale:

<http://nibis.ni.schule.de/~lbs-gym/Verschiedenespdf/zTransformation.pdf> ; geprüft 11/2014

<ftp://www.inf.fh-dortmund.de/pub/professors/cleven/kapitel9alt.pdf> ; geprüft 11/2014

Zu Fensterfunktionen: <http://de.wikipedia.org/wiki/Fensterfunktion>; geprüft 11/2014

Berechnung der Koeffizienten der Zähler- und Nennerpolynome für digitale Filter aus Grenzfrequenz und Abtastfrequenz:

[http://www.fh-schmalkalden.de/schmalkaldenmedia/Realisierung\\_Digitaler\\_Filter\\_in\\_C-p-419.pdf](http://www.fh-schmalkalden.de/schmalkaldenmedia/Realisierung_Digitaler_Filter_in_C-p-419.pdf) ; geprüft 11/2014

---

### Weiterführende Literatur:

Husa, Peterr: *Biosignalverarbeitung*, Springer 2010.

Ceruti und Marchesi (Hrsg.): *Advanced Methods of Biomedical Signal Processing* (IEEE Press Series on Biomedical Engineering), John Wiley & Sons 2011.

Schlittgen R. und Streitberg, B.H. J.: *Zeitreihenanalyse* 9. Ausgabe , R. Oldenburg Verlag, 2001, 1. Nachdruck 2013.

Brockwell, Davis: *Time Series: Theory and Methods* (Springer Series in Statistics). 2nd Edition, Springer 2006.

Pesenson, Misha Meyer: *Multiscale Analysis and Nonlinear Dynamics: From Genes to the Brain* (Annual Reviews of Nonlinear Dynamics and Complexity (VCH)). Wiley VCH 2013.

Oppenheim,A.V., Schafer, R.W: *Discrete-Time Signal Processing*, 3rd Edition, Pearson Education, 2009.

Proakis, J.G., Manolakis, D.K.: *Digital Signal Processing. New International Edition*. Kindle Edition 2013.

Mitra, S: *Digital Signal Processing: A Computer-Based Approach*. (2011) 4th (fourth) Edition. McGraw-Hill Higher Education (2011)

Haykin, Simon: *Adaptive Filter Theory*. 5th edition. Pearson Education 2013.

## 1.8 Bildverarbeitung

Anwendung verschiedener Filter an einem Beispielbild:

|                                                                                   |                                                                                    |
|-----------------------------------------------------------------------------------|------------------------------------------------------------------------------------|
|  |  |
| Stark verrauschtes Bild                                                           | Filter - Tiefpass                                                                  |

Abb. 6 Anwendung des Tiefpassfilters auf ein (stark verrauschtes) Beispielbild

|                                                                                    |                                                                                     |
|------------------------------------------------------------------------------------|-------------------------------------------------------------------------------------|
|  |  |
| Stark verrauschtes Bild                                                            | Filter - Hochpass                                                                   |

Abb. 7 Anwendung des Hochpassfilters

|                                                                                     |                                                                                      |
|-------------------------------------------------------------------------------------|--------------------------------------------------------------------------------------|
|  |  |
|-------------------------------------------------------------------------------------|--------------------------------------------------------------------------------------|



|                         |                   |
|-------------------------|-------------------|
| Stark verrauschtes Bild | Filter - Bandpass |
|-------------------------|-------------------|

Abb. 8 Anwendung des Bandpassfilters

|                                                                                   |                                                                                    |
|-----------------------------------------------------------------------------------|------------------------------------------------------------------------------------|
|  |  |
| Stark verrauschtes Bild                                                           | Filter - Gauß                                                                      |

Abb. 9 Anwendung des Gauß-Filters

---

### **Weiterführende Literatur und Links**

*Hochmuth O, Meffert B: Werkzeuge der Signalverarbeitung: Grundlagen, Anwendungsbeispiele, Übungen. Pearson Studium IT, 2004.*

*Jähne B: Digitale Bildverarbeitung und Bildgewinnung. Springer 2012.*

*Neumann B: Bildverarbeitung für Einsteiger: Programmbeispiele mit Mathcad. Springer 2004.*

*Handels H, Ehrhardt J, Deserno TM, Meinzer HP, Tolxdorff T (Hrsg): Bildverarbeitung für die Medizin. Springer 2011.*

*Handels H: Medizinische Bildverarbeitung: Bildanalyse, Mustererkennung und Visualisierung für die Computergestützte Ärztliche Diagnostik und Therapie. Vieweg+Teubner 2006.*

*<http://www.miszalok.de/> - Homepage von Prof. Dr. med. Miszalok, mit einer sehr guten Einführung in die Grundbegriffe der Bildverarbeitung, dazu viele Codebeispiele in Java/C#.*

*<http://www2.informatik.hu-berlin.de/~meffert/> – Signalverarbeitung und Mustererkennung von Prof. Dr.-Ing. Beate Meffert*

## **1.9 Datenbanken**

Beispiele für DBMS, die auf dem relationalen Datenmodell beruhen sind:

- MySQL
- PostgreSQL
- Oracle
- SQLite
- Microsoft Access



Beispiele für DBMS, die den schemafreien Systemen angehören, sind:

- MongoDB
- Cassandra
- Neo4J

---

**Weiterführende Literatur:**

*Kudraß (Hrsg.): Taschenbuch Datenbanken. Fachbuchverlag Leipzig im Carl Hanser Verlag 2007, neue Auflage 2014).*

*Beighley, Schulten: SQL von Kopf bis Fuß. O'Reilly, 1. Auflage 2008.*

## 1.10 Rechnernetze

---

**Weiterführende Literatur und Links**

*Klaus Richter, Dirk Scharf, Carsten Rathgeber, Hans-Joachim Petersen, Heinrich Hübscher. IT-Handbuch IT-Systemelektroniker, -in, Fachinformatiker, -in. 8. Auflage, 2013. Westermann. ISBN-13: 978-3142350424*

## 1.11 Informationssicherheit

Siebenhüner. Wartung technischer Systeme im Krankenhaus durch externe Dienstleister/Datenschutzrechtliche Aspekte. 1. Auflage, 2013; Deutsche Krankenhaus Verlagsgesellschaft mbH. ISBN-13: 978-3-942734-49-3

Kritik am neuen Personalausweis: <http://www.heise.de/ct/artikel/Der-Internet-Ausweis-1111003.html>

---

**Weiterführende Literatur**

*Andrea Hauser, Ina Haag. Datenschutz im Krankenhaus. 4. Auflage, 2012. Deutsche Krankenhaus Verlagsgesellschaft mbH. ISBN-13: 978-3-942734-25-7*

*Empfehlungen zur ärztlichen Schweigepflicht, Datenschutz und Datenverarbeitung in der Arztpraxis* <http://www.bundesaerztekammer.de/page.asp?his=0.7.47.6188>;

[http://www.bundesaerztekammer.de/downloads/Empfehlung\\_Schweigepflicht\\_Datenschutz.pdf](http://www.bundesaerztekammer.de/downloads/Empfehlung_Schweigepflicht_Datenschutz.pdf)

*BSI: IT-Grundschutzhandbuch*

[https://www.bsi.bund.de/DE/Themen/ITGrundschutz/ITGrundschutzKataloge/itgrundschutzkataloge\\_node.html](https://www.bsi.bund.de/DE/Themen/ITGrundschutz/ITGrundschutzKataloge/itgrundschutzkataloge_node.html)

*Simon Singh: Geheime Botschaften – Die Kunst der Verschlüsselung von der Antike bis in die Zeit des Internet (engl. Original The Code Book. The Science of Secrecy from Ancient Egypt to Quantum Cryptography), DTV 2011. – Sehr lesenswerte Geschichte der Kryptographie und Kryptoanalyse, für Laien geschrieben.*

*Gärtner A (Hrsg): Medizintechnik und Informationstechnologie, Band 1-3. TÜV Rheinland Media Group 2011.*

*Müller RK: IT-Sicherheit mit System. Integratives IT-Sicherheits-, Kontinuitäts- und Risikomanagement. Springer Vieweg 2014.*

*GI-Fachgruppe SECMGT - Management von Informationssicherheit (nur GI-Mitglieder)*

---

### **Weiterführende Literatur**

*Java Platform. Standard Edition (Java SE) 8 Documentation, 2014.*

*Ullenboom C. Java ist auch eine Insel: Das umfassende Handbuch (10. Auflage). Bonn, Galileo Computing, 2011.*

*Heinisch C, Müller-Hofmann F, Goll J: Java als erste Programmiersprache – Vom Einsteiger zum Profi (6. Auflage). Vieweg+Teubner, 2010.*

*Java Code Conventions. Sun Microsystems, 1997.*

## 1.12 Medizinische Dokumentation

InEK (Institut für Entgeltsystem im Krankenhaus): <http://www.g-drg.de/>

Stellungnahme des Hartmannbunds zu den Ambulanten Kodierrichtlinien (AKR):

<http://www.hartmannbund.de/de/wir-ueber-uns/der-hartmannbund/positionen/akr/>

Deutsches Institut für Medizinische Dokumentation und Informatik: <http://www.dimdi.de/>

---

### **Weiterführende Literatur**

*Leiner, Gaus, Haux, Knaup-Gregori, Pfeiffer: Grundlagen einer qualitätsgesicherten integrierten Krankenversorgung Lehrbuch und Leitfaden. 6., überarb. Aufl., Schattauer 2012.*

*Koller, Wagner: Handbuch der medizinischen Dokumentation und Datenverarbeitung. Verlag Schattauer 1997.*

*Klar, Graubner: Medizinische Dokumentation = Kapitel 2 des Lehrbuchs der Medizinischen Informatik, Biometrie und Epidemiologie. Hrsg: Hans-Jürgen Seelos. DeGruyter 1997.*

*Haas: Medizinische Informationssysteme und elektronische Krankenakten, Springer 2005.*

*Laufs, Katzenmeier, Lipp: Arztrecht. 6. Auflage, C.H. Beck München 2009.*

*Seidel, Kosock, Brandner, Balfanz, Schmücker: Empfehlungen für den Einsatz elektronischer Signaturen und Zeitstempel in Versorgungseinrichtungen des Gesundheitswesens. Hrsg: Competence Center für die Elektronische Signatur im Gesundheitswesen e.V. CCESigG 2010.*

### 1.13 Evidenzbasierte Medizin

PubMed: <http://www.pubmed.de/>

Programm Nationale VersorgungsLeitlinien der Bundesärztekammer, der Kassenärztlichen Bundesvereinigung und der Arbeitsgemeinschaft der Wissenschaftlichen Medizinischen Fachgesellschaften: <http://www.versorgungsleitlinien.de/>

Embase: <http://www.elsevier.com/online-tools/embase>

Deutsches Netzwerk Evidenzbasierte Medizin e.V.: <http://www.ebm-netzwerk.de>

Das Deutsche Cochrane Zentrum: <http://www.cochrane.de>

The Cochrane Library: <http://www.thecochranelibrary.com>

Cochrane Handbook for Systematic Reviews of Interventions: <http://handbook.cochrane.org>

Centre for Evidence-Based Medicine, University of Oxford: <http://www.cebm.net>

---

#### **Weiterführende Literatur**

*Herkner, Müllner: Erfolgreich wissenschaftlich arbeiten in der Klinik. Grundlagen, Interpretation und Umsetzung: Evidence Based Medicine, Springer 2011.*

*Greenhalgh: How to read a paper, John Wiley & Sons 2010 bzw. The Medline database. BMJ 315: 180-3, 1997 und weitere Artikel der Reihe „How to read a Paper“.*

*Sackett, Richardson, Rosenberg, Haynes: Evidence-based Medicine, Churchill Livingstone 1996.*

## **1.14 Informations- und Kommunikationssysteme im Gesundheitswesen**

Lehmann, Thomas; Meyer zu Bexten, Erdmuthe (Hrsg.): Handbuch der Medizinischen Informatik. München/Wien: Carl Hanser (2002).

Eckardt/Sens: Praxishandbuch Integrierte Behandlungspfade, Springer 2006.

Deutschen Gesellschaft für Medizinische Informatik, Biometrie und Epidemiologie  
<http://www.gmds.de/>

---

### **Weiterführende Literatur und Links**

*Haas P: Medizinische Informationssysteme und Elektronische Krankenakten. Springer Verlag 2005.*

*Prokosch HU: KAS, KIS, EKA, EPA, EGA, E-Health - Ein Plädoyer gegen die babylonische Begriffsverwirrung in der Medizinischen Informatik (2001).*

*Himmelstein DU, Wright A, Woolhandler S: Hospital Computing and the Costs and Quality of Care: A National Study. The American Journal of Medicine (2009).*

*Gärtner A (Hrsg.): Medizintechnik und Informationstechnologie, Band 1-3.  
sowie Medizinproduktesicherheit – Band 1-6. TÜV Media GmbH TÜV Rheinland Group, 2011.*

*Chuang KS, Huang HJ, Ratib OM, Bakker AR, Witte G: Picture Archiving and Communication Systems (PACS) in Medicine. Springer 2012.*

*AGFA IMPAX EE Server 2.17.1 MINIMUM HARDWARE & SOFTWARE REQUIREMENTS*

*AGFA IMPAX EE Releaseinformationen für Administratoren*

*[http://www.agfahealthcare.com/he/germany/de/binaries/IMPAX\\_EE\\_2009\\_low\\_tcm602-90708.pdf](http://www.agfahealthcare.com/he/germany/de/binaries/IMPAX_EE_2009_low_tcm602-90708.pdf) - AGFA ORBIS RIS diagnostics workflows*

*[http://www.agfahealthcare.com/global/en/main/products\\_services/product-info/interoperability/ihe/index.jsp](http://www.agfahealthcare.com/global/en/main/products_services/product-info/interoperability/ihe/index.jsp)*

*<http://www.medizin-informatik.org/scripte/mi/ris/systemeinf.html> - Einführung von Informationssystemen*

## 1.15 Standards und Schnittstellen

HL7-Organisation <http://www.hl7.org/>

DICOM: <http://dicom.nema.org>

Integrating the Healthcare Enterprise <http://www.ihe.net/>  
<http://www.ihe-d.de>

Qualitätsring Medizinische Software: <http://www.qms-standards.de>

---

### **Weiterführende Literatur und Links:**

*Johner C, Haas P: Praxishandbuch IT im Gesundheitswesen: Erfolgreich einführen, entwickeln, anwenden und betreiben. Carl Hanser 2009.*

*Müller H: Konzeption und Realisierung von DICOM Schnittstellen für ein Teleradiologiesystem. Diplomarbeiten Agentur diplom.de, 1997.*

*Starke S: IHE - Integrating the Healthcare Enterprise: Realization of the Retrieve Information for Display Profile Shown Upon the Clinical Multimedia Archive DOMAIN. Design, Implementation, Perspectives. Vdm 2008.*

*Bärwolff H, Victor F, Hüsken V: IT-Systeme in der Medizin: IT-Entscheidungshilfe für den Medizinbereich - Konzepte, Standards und optimierte Prozesse. Vieweg+Teubner, 2006.*

*König H: Protocol Engineering Prinzip, Beschreibung und Entwicklung von Kommunikationsprotokollen. Teubner 2003.*

## **1.16 Medizintechnik**

### **1.16.1 Institutionen**

Zentralstelle der Länder für Gesundheitsschutz bei Arzneimitteln und Medizinprodukten  
<https://www.zlg.de/index.php> ; geprüft 11/2014.

### **1.16.2 Medizinprodukte Regulation und Gesetze**

#### *Europa*

Die Guidelines der EU wurden in den letzten Jahren überarbeitet:

Klassifikation von Medizinprodukten 2010,

Software als Medizinprodukt 2012,

Medizinproduktüberwachung und Post-Marketing Follow-Up 2012

und Klinische Studien 2010

[http://ec.europa.eu/health/medical-devices/documents/guidelines/index\\_en.htm](http://ec.europa.eu/health/medical-devices/documents/guidelines/index_en.htm); geprüft 11/2014

Zum Europäischen Gesetzesrahmen:

[http://europa.eu/eu-law/decision-making/legal-acts/index\\_en.htm](http://europa.eu/eu-law/decision-making/legal-acts/index_en.htm); geprüft 11/2014.

Europäische Gesetze:

<http://eur-lex.europa.eu/de/index.htm>; geprüft 11/2014.

New Approach: <http://www.newapproach.org>; geprüft 11/2014.

#### *Deutsche Gesetze und Verordnungen:*

<http://www.gesetze-im-internet.de>; geprüft 11/2014.

### **1.16.3 Global Harmonization**

Die Global Harmonization Task Force (GHTF), in der Hersteller und Regulatoren international zusammen arbeiteten, ist 2011 durch ein rein regulatorisches Gremium, das International Medical Device Regulators Forum (IMDRF) ersetzt worden.

<http://www.imdrf.org> ; geprüft am 11/2014

### **1.16.4 Europäische Richtlinien**

Die derzeit noch gültigen Richtlinien sollen durch eine Europäische Verordnung ersetzt werden.

Der Stand der aktuellen Europäischen Gesetzgebung ist zu finden unter:

[http://ec.europa.eu/health/medical-devices/documents/revision/index\\_en.htm](http://ec.europa.eu/health/medical-devices/documents/revision/index_en.htm); geprüft 11/2014.

Positionspapier des BMG:

<http://www.bmg.bund.de/gesundheitsystem/medizinprodukte/neue-eu-rechtsvorschriften.html>; geprüft 11/2014

Richtlinien:



MDD:

<http://eur-lex.europa.eu/legal-content/DE/TXT/PDF/?uri=CELEX:01993L0042-20071011&rid=1>; oder Englisch:  
<http://eur-lex.europa.eu/LexUriServ/LexUriServ.do?uri=CONSLEG:1993L0042:20071011:EN:PDF>; geprüft 11/2014.

Tissue Engineering:

<http://eur-lex.europa.eu/legal-content/DE/TXT/PDF/?uri=CELEX:02003L0032-20030516&rid=2>; geprüft 11/2014.

In vitro Diagnostika

<http://eur-lex.europa.eu/legal-content/DE/TXT/PDF/?uri=CELEX:01998L0079-20120111&rid=15>; geprüft 11/2014.

Implantierbare Medizinprodukte

<http://eur-lex.europa.eu/legal-content/DE/TXT/PDF/?uri=CELEX:01990L0385-20031120&rid=1>; geprüft 11/2014.

Siehe auch: [http://ec.europa.eu/health/medical-devices/index\\_en.htm](http://ec.europa.eu/health/medical-devices/index_en.htm); geprüft 11/2014

### 1.16.5 Software als Medizinprodukt

*Beispiel für eine Validierung:*

Validierung von Blutdruckmessgeräten bei Topouchian J et al.: Validation of four devices: Omron M6 Comfort, Omron HEM-7420, Withings BP-800, and Polygreen KP-7670 for home blood pressure measurement according to the European Society of Hypertension International Protocol. Vascular Health and Risk Management, 2014:10 pp. 33 - 44; DOI:  
<http://dx.doi.org/10.2147/VHRM.S53968>; geprüft am 11/2014

Use Cases sind hilfreich für die Entwicklung der Spezifikation und der Tests zur Verifizierung der Spezifikationen insbesondere auch im Hinblick auf Gebrauchstauglichkeit. Sie lassen sich auch graphisch darstellen siehe:

<http://www.agilemodeling.com/artifacts/useCaseDiagram.htm> ; geprüft 11/2014

Weiterführende Ausführungen zum Testen finden sich auf der Website des German Testing Board e.V. (GTB): <http://www.german-testing-board.info> ; geprüft 11/2014.

Apps

**Devices 4 Limited (D4)** ist eine britische gemeinnützige Organisation, die sich der Unterstützung der Anwendung medizinischer Apps verschrieben hat und zur *Regulation von Gesundheits Apps* ein *White -Paper* veröffentlicht hat:

<http://www.d4.org.uk/research/regulation-of-health-apps-a-practical-guide-January-2012.pdf> ;  
geprüft 11/2014

Beispiel: <http://www.merseyburns.com>; geprüft 11/2014

### 1.16.6 Risikoanalyse und Gebrauchstauglichkeit

Die **gebrauchstauglichkeitsbezogene Risikoanalyse** nach DIN EN 62366 korrespondiert der Risikoanalyse nach DIN EN14971.

Bei der Risikoanalyse zur Gebrauchstauglichkeit müssen folgende Informationen zusammengestellt und berücksichtigt werden:

- die Spezifikation der Anwendung

das Anwender-Profil;

Vorhersagbare **Benutzungsfehler**;

Auf Aufgaben bezogene Anforderungen;

Benutzungskontext;

Informationen über **bekannte Gefährdungen** für bestehende Benutzer- Gerät-Schnittstellen für Geräte eines ähnlichen Typs, wenn verfügbar;

Ergebnisse der Überprüfung der Benutzer-Gerät-Schnittstelle.

Die gebrauchstauglichkeitsorientierte Entwicklung ist in der Regel ein iterativer den Lebenszyklus begleitender Prozess, der in unmittelbarer Interaktion mit Anwendern erfolgt. Der Aufwand kann risikobasiert skaliert werden mit höherem Aufwand für Neuentwicklungen, komplexe Benutzerhandlungen/neue Technologien oder lebenswichtige Medizinprodukte.

Die **Spezifikation der Gebrauchstauglichkeit** beschreibt mindestens **Benutzungsszenarien**, **Bedienerhandlungen** im Zusammenhang mit Hauptbedienfunktionen, Anforderungen an die **Bediener/Geräteschnittstelle** für Hauptbedienfunktionen sowie Kriterien für die **Feststellung, ob die Hauptbedienfunktionen vom Bediener leicht** zu erkennen sind.

**Primären Spezifikationen** ergeben sich dabei aus dem beabsichtigten Zweck des Medizinprodukts bezogen auf den Nutzerkreis und die Anwendungsumgebung und aus allgemeinen Anforderungen, z. B. rasche Erlernbarkeit der Benutzung, zweckentsprechende und robuste Hauptbedienfunktionen, die gegenüber Eingabefehlern der Anwender tolerant sind. Diese Spezifikationen lassen sich gut aus Anwendungsfällen (Use-Case) unter Berücksichtigung der vernünftigerweise vorhersehbaren Fehlbenutzung sowie der Benutzungsfehler aus der Risikoanalyse ableiten.

Weitere Spezifikationen ergeben sich aus **gesetzlichen Anforderungen**, z.B. zur Barrierefreiheit (Barrierefreie Informationstechnik Verordnung BITV) oder zu Bildschirmarbeitsplätzen: Verordnung über Sicherheit und Gesundheitsschutz bei der Arbeit an Bildschirmgeräten (Bildschirmarbeitsverordnung – BildscharbV).

Darüber hinaus ist der **Nachweis der Konformität** zu führen: Leitlinien für die Zugänglichkeit von Geräten und Diensten in der Informations- und Kommunikationstechnologie (EN ISO 9241-20), Anforderungen an Gebrauchstauglichkeit (ISO 9241-11), Anforderungen an Informationsdarstellung (ISO 9241-12), Anforderungen an Dialoggestaltung (ISO 9241-110), Leitlinien für die Zugänglichkeit von Software (EN ISO 9241-171), Anforderungen, die sich aus der Prozessnorm ISO 9241-210 ergeben, z.B. Grundsätze der menschenzentrierten Gestaltung

**Optionale Spezifikationen** ergeben sich aus Leitlinien und Empfehlungen und Style Guides für Entwickler von Software, z.B. die iOS Human Interface Guidelines.

### 1.16.7 Validierung der Gebrauchstauglichkeit

Der **Validierungsplan für Gebrauchstauglichkeit** spezifiziert für die Hauptbedienfunktionen die Methode der Validierung und die Kriterien zur Feststellung einer erfolgreichen Validierung sowie beschreibt die beabsichtigten Anwender.

Nach der Norm muss der Validierungsplan für Gebrauchstauglichkeit behandeln:

Benutzungsszenarien für den schlechtesten Fall (**Worst Case Scenario**) anhand der Spezifikation der Anwendung, vorhersagbarer Benutzungsfehler und dem Ergebnis der Risikolanalyse

Benutzungsszenarien, die **häufige Anwendungen** repräsentieren, wie sie in der Spezifikation der Gebrauchstauglichkeit identifiziert wurden.

Zur **Bewertung der Gebrauchstauglichkeit** kommen **Benutzerbefragung**, **Expertenbefragung** oder **Benutzertests** in Frage – letztere haben die höchste Aussagekraft für das Bedienrisiko, sind aber erst ab der Prototypphase einsetzbar.

Beispiele für die Validierung der Gebrauchstauglichkeit sind:

**Objektive Gebrauchstauglichkeitsziele:** z.B. 90% der Benutzer müssen die Druckmessung innerhalb von 5min kalibrieren können oder 80% der Benutzer müssen nach der Ersteinweisung die Software ohne Nachschulung bedienen können.

**Subjektive Gebrauchstauglichkeitsziele:** z.B. mind. 2/3 der Benutzer bevorzugen das neue Produkt gegenüber der Vorgängerlösung oder 80% der Benutzer geben der neuen Software >3 von 5 Punkten (sehr schlecht bis sehr gut).

Nach Backhaus (Backhaus Claus. Usability Engineering in der Medizintechnik, Springer Heidelberg 2010) kann die Gebrauchstauglichkeit in einer **Ampelskala** mit **rot** (schweres Bediendefizit, Maßnahmen erforderlich), **gelb** (potentielles Bediendefizit) und **grün** (kein Bediendefizit) eingeteilt werden.

---

### Ausgewählte Literatur und Links

*Böckmann, Frankenberger: MPG & Co. Eine Vorschriftensammlung zum Medizinprodukterecht mit Fachwörterbuch. 6. aktualisierte Auflage. TÜV Media GmbH, TÜV Rheinland Group 2010.*

*Mildner (Hrsg): Regulatorische Anforderungen an Medizinprodukte. Einführung und Handlungshilfen - von klinischer Bewertung bis HTA. Schriftenreihe TMF. Medizinisch Wissenschaftliche Verlagsgesellschaft 2011.*

*Vogel: Medical Device Software-Verification, Validation and Compliance. Boston, Artech house 2011.*

*Aktueller Stand der Überarbeitung des Europäischen Medizinprodukterechts:*

[http://ec.europa.eu/health/medical-devices/documents/revision/index\\_en.htm](http://ec.europa.eu/health/medical-devices/documents/revision/index_en.htm)

*Gärtner: Normen in der Medizintechnik. Bd. 3 Reihe Medizinproduktesicherheit, TÜV Media GmbH, TÜV Rheinland Group 2009.*

*DIN-VDE-Taschenbuch 354/1: Gebrauchstauglichkeit von Software 1-Grundsätzliche Empfehlungen für Produkt-und Prozessgestaltung. Hrsg. DIN Deutsches Institut für Normung e.V., VDE Verband der Elektrotechnik, Elektronik, Informationstechnik e.V., Beuth Verlag 2011.*

*Schneider: Ergonomische Gestaltung von Benutzungsschnittstellen-Kommentar zur Grundsatznorm DIN EN ISO 9241-110. 2. Auflage. Beuth Verlag 2008.*

*Backhaus: Usability-Engineering in der Medizintechnik. Springer 2010.*

*Gute Einführung in Usability Engineering und Ergonomie. Manko: keine neue Literatur nach 2003 (Ausnahme Normen bis 2007).*

*Johner, Hölzer-Klüpfel, Wittorf: Basiswissen Medizinische Software. dpunkt.verlag, Heidelberg 2011.*

*Ebert: Systematisches Requirements Engineering. 3., aktualisierte und erweiterte Auflage. dpunkt.verlag, Heidelberg 2010.*

*Spillner, Linz: Basiswissen Softwaretest. 4., überarbeitete und aktualisierte Auflage. dpunkt.verlag Heidelberg 2010.*

*Gärtner: Kommunizierende medizinische Systeme und Netzwerke. In Kramme (Hrsg): Medizintechnik. 4. Auflage, Springer 2011. Seite 773-780.*

*Deutsche Krankenhausgesellschaft e. V.: Anwendung des Risikomanagements für IT-Netzwerke, die Medizinprodukte beinhalten – Umsetzungshinweise für Krankenhäuser. 1. Auflage 2011.*

*Ahlbrandt J et al. Risikomanagement für medizinische Netzwerke in der Intensiv- und Notfallmedizin. Gemeinsames Positionspapier zur Norm IEC 80001-1*

*Links:*

*Human Factors and Ergonomics Society:*

<https://www.hfes.org//Web/Default.aspx> ;geprüft 11/2014

*FDA Guidance for Industry and FDA Premarket and Design Control Reviewers*

*Medical Device Use-Safety: Incorporating Human Factors Engineering into Risk Management (2000):*

<http://www.fda.gov/downloads/MedicalDevices/DeviceRegulationandGuidance/GuidanceDocuments/ucm094461.pdf> ; geprüft 11/2014

*Barrierefreie Informationstechnik-Verordnung 2.0 :*

<http://www.barrierefreies-webdesign.de/bitv/bitv-2.0.html>; geprüft 11/2014

*Rudloff, Christiane Handbuch der Softwareergonomie:*

<http://www.ukpt.de/pages/dateien/software-ergonomie.pdf> ; geprüft 11/2014

**VDMA Leitfaden Software-Ergonomie (2004):**

<http://www.vdmashop.de/Entscheidungshilfen/Informatik-und-Technik/Leitfaden-Software-Ergonomie::2188.html> ; geprüft 11/2014

*Europäische Agentur für Sicherheit und Gesundheit am Arbeitsplatz zur Bildschirmarbeit:*

<https://osha.europa.eu/fop/germany/de/topics/bildschirmarbeit> ; geprüft 11/2014 ;

Stellungnahme der Deutschen Gesellschaft für Medizinische Informatik, Biometrie und Epidemiologie (GMDS) zur EN 80001-1:

*<http://www.egms.de/static/en/journals/mibe/2013-9/mibe000137.shtml> ; geprüft 11/2014*

Positionspapier des VDE ) zur EN 80001-1:

*<https://www.vde.com/de/InfoCenter/Seiten/Details.aspx?eslShopItemID=761b5aee-0fba-489d-9ffb-59215692178c> ; geprüft 11/2014*

## **1.17 Telemedizin**

### **Aktuell:**

Ein E-Health Gesetz sollte ursprünglich zum Ende des Jahres 2014 verabschiedet werden wird aber wohl erst 2015 kommen.

Näheres zur Anhörung im Bundestag zum E-Health-Gesetz am 12.11.2014:

<http://gruen-digital.de/2014/11/anhoerung-im-bundestag-zum-thema-e-health-am-12-nov-2014/>; geprüft 15.12.2014

Wesentlicher Bestandteil des neuen Gesetzes werden Regelungen zur Telematikinfrastruktur und elektronischen Gesundheitskarte sein. Insbesondere betrifft das:

- Fristen: Umsetzungsvorgaben für Notfalldaten, Entlassbriefe und Medikationsplanung als Anwendungen auf der elektronischen Gesundheitskarte.
- Finanzierung: Kein zweiter Rollout der Gesundheitskarte ohne Geschäftsmodell! Eine rechtzeitige Finanzierungsvereinbarung ist erforderlich.
- Öffnung der Infrastruktur: Die Telematikinfrastruktur muss sich weiteren Anwendungen öffnen, wenn sie die maßgebliche Infrastruktur des deutschen Gesundheitswesens werden will. Sie gibt das Sicherheitsniveau im Gesundheitswesen vor.
- Interoperabilität: Fehlende Interoperabilität ist unwirtschaftlich und für die Akteure belastend. Derzeit bestehen zahlreiche Praxis- und Kliniksoftwaresysteme an, die untereinander kaum kommunizieren können.

### **Datenschutzrechtliche Aspekte**

Ein Elektronisches Gesundheitsberuferegister (eGBR) soll aufgebaut werden. Heilberufs- und Berufsausweise sind zum Zugriff auf Gesundheitskarte und Telematikinfrastruktur erforderlich (Public Key Infrastruktur, PKI). Link:

<https://www.eibr.de/startseite/>; geprüft 15.12.2014

Identifikation und elektronische Signatur soll über Elektronische Ausweise erfolgen. Die Bundesdruckerei hat hierzu den Personalausweis bzw. den elektronischen Aufenthaltstitel speziell mit einem Chip ausgestattet (Plattform „sign-me“). Link:

<https://www.bundesdruckerei.de/de/199-sign-me>; geprüft 15.12.2014

### **Allgemeine Infoportale**

Das Bundesgesundheitsministerium betreibt ein Deutsches Telemedizin-Portal, das die Entwicklung neuer Telemedizinanwendungen zur Verbesserung der medizinischen Versorgung in Deutschland unterstützt.

<https://www.bundesgesundheitsministerium.de/ministerium/presse/pressemitteilungen/2012-04/deutsches-telemedizin-portal-gestartet.html>; geprüft 15.12.2014

Dabei arbeitet BMG mit Der Fraunhofer Stiftung zusammen:

<http://telemedizin.fokus.fraunhofer.de/>; geprüft 15.12.2014

Stellungnahme der BÄK zu persönlichen Leistungserbringung:

<http://www.bundesaerztekammer.de/page.asp?his=0.7.47.3225>; geprüft 15.12.2014

Alles zur Gesundheitskarte und Telematikinfrastruktur findet sich unter:

<https://www.gematik.de/cms/de/startseite/index.jsp> ; geprüft 15.10. 2014

### **1.17.1 Technische Grundlagen**

**Bundesnetzagentur:** <http://emf3.bundesnetzagentur.de/>; geprüft 15.12.2014

**Frequenzzuteilungen:**

[http://www.elektrosmog.de/wasist\\_d.htm](http://www.elektrosmog.de/wasist_d.htm); geprüft 15.12.2014

<http://www.lte-anbieter.info/ratgeber/frequenzen-lte.php>; geprüft 15.12.2014

**Multiplexing und Netze:**

[http://de.wikipedia.org/wiki/Plesiochrone\\_Digitale\\_Hierarchie](http://de.wikipedia.org/wiki/Plesiochrone_Digitale_Hierarchie); geprüft 15.12.2014

<http://www.elektronik-kompodium.de/sites/kom/1207161.htm>; geprüft 15.12.2014

<http://www.elektronik-kompodium.de/sites/kom/1207171.htm>; geprüft 15.12.2014

**Modulation:**

<http://de.wikipedia.org/wiki/Quadraturamplitudenmodulation>; geprüft 15.12.2014

**Bluetooth-Standard:** <http://www.bluetooth.org>; geprüft 15.12.2014

Das Integrating the Healthcare Enterprise (IHE) ist eine Initiative von Gesundheitsdienstleistern und Industrie, das sich um eine Standardisierung in der medizinischen Informatik bemüht. Dort wird unter anderem der Cross-Enterprise Document Sharing (XDS) Standard gepflegt.

[http://wiki.ihe.net/index.php?title=Cross-Enterprise\\_Document\\_Sharing](http://wiki.ihe.net/index.php?title=Cross-Enterprise_Document_Sharing) ; geprüft 15.12.2014

Eine Übersicht zum bereitgestellten Technical Framework findet sich unter:

[http://www.ihe.net/Technical\\_Frameworks/#IT](http://www.ihe.net/Technical_Frameworks/#IT) ; geprüft 15.12.2014

Das American College of Radiology (ACR), die American Association of Physicists in Medicine (AAPM) und die Society of Imaging Informatics in Medicine (SIIM) haben einen technischen Standard zur Bildgebung herausgegeben:

Norweck JT et al. ACR–AAPM–SIIM Technical Standard for Electronic Practice of Medical Imaging. J Digit Imaging (2013) 26:38–52. DOI 10.1007/s10278-012-9522-2;

[http://www.iso.org/iso/catalogue\\_detail?csnumber=41298](http://www.iso.org/iso/catalogue_detail?csnumber=41298) ; geprüft 15.12. 2014



### **1.17.2 Europäische Datenschutzverordnung**

Die EU-Datenschutz Grundverordnung (EU-DSGVO) wird kommen. Insbesondere Artikel 81 zur Gesundheitsversorgung und Artikel 83 zu Forschung werden die Telemedizin betreffen. Die Regelungen sind teilweise restriktiver als derzeit. Insbesondere die derzeit gültigen Landeskrankenhausgesetze beinhalten Forschungsklauseln, die eine wissenschaftliche Bearbeitung krankenhauseigener Daten gestatten.

Im Mai 2013 gab es schon weit über 3000 Änderungsanträge zur Europäischen Datenschutzgrundverordnung. Sie soll die Richtlinie 95/46/EG ablösen. Entwurf mit Änderungen:

[http://www.weidenholzer.eu/wp-content/uploads/2013/10/EUDATAP\\_allcompromises.pdf](http://www.weidenholzer.eu/wp-content/uploads/2013/10/EUDATAP_allcompromises.pdf);  
geprüft 15.12.2014

Stellungnahme der TMF

<http://www.tmf-ev.de/Desktopmodules/Bring2Mind/DMX/Download.aspx?EntryId=25100&PortalId=0>; geprüft  
15.12.2014

Aktueller konsolidierter Text Stand März 2014:

[http://www.lda.bayern.de/lda/datenschutzaufsicht/lda\\_daten/Synopse\\_DS\\_GVO\\_EU\\_Parlament\\_BayLDA.pdf](http://www.lda.bayern.de/lda/datenschutzaufsicht/lda_daten/Synopse_DS_GVO_EU_Parlament_BayLDA.pdf); geprüft 15.12.2014

### **1.17.3 Telemediengesetz**

Das Telemediengesetz vom 26. Februar 2007 (BGBl. I S. 179), das zuletzt durch Artikel 1 des Gesetzes vom 31. Mai 2010 (BGBl. I S. 692) geändert worden ist, regelt den allgemeinen Rahmen für telemediale Dienstleistungen und gilt ohne Ausnahme daher auch für die Telemedizin. In Abschnitt 2 sind Zulassungsfreiheit und Informationspflichten geregelt und in Abschnitt 3 Verantwortlichkeiten festgelegt. Abschnitt 4 betrifft den Datenschutz.

<http://www.gesetze-im-internet.de/tmg/index.html>; geprüft 15.12.2014

### **1.17.4 Projekt Trusted Cloud des Bundesministeriums für Wirtschaft**

Bundeswirtschaftsministerium startet Pilotprojekt „Datenschutz-Zertifizierung von Cloud-Diensten“.

<http://www.bmwi.de/DE/Presse/pressemitteilungen,did=600746.html>; geprüft 15.12.2014

BMW-Technologieprogramms; „Trusted Cloud“

<http://www.trusted-cloud.de/#&panel1-1>; geprüft 15.12.2014

Publikationen zu Rechtsfragen des Cloud Computing durch das BMWi.

<http://trusted-cloud.de/369.php>; geprüft 15.12.2014

Die Auftragsdatenverarbeitung ist ein zentraler Anwendungsfall.

Die Regeln der Auftragsdatenverarbeitung, insbesondere die Anforderungen an den Vertrag und an die Kontrolle des Auftragnehmers durch den Auftraggeber, passen nicht uneingeschränkt zu modernen Formen der Datenverarbeitung und müssen überarbeitet werden.

Die primäre rechtliche Verantwortlichkeit des Auftraggebers in der Auftragsdatenverarbeitung ist auch im Zeitalter von Internet und Cloud Computing sachgerecht.

Die Anforderungen an den Vertrag über Auftragsdatenverarbeitung müssen so gefasst werden, dass der Vertragsinhalt vom Auftragnehmer mit den gesetzlich geforderten Inhalten weitgehend vorbereitet und zum Beispiel über Webformulare erfüllt werden kann.

Das wesentliche Problem des Kontrollerfordernisses kann gelöst werden, wenn die Kontrolle durch den Auftraggeber durch das von einem unabhängigen Dritten erstellte Testat ersetzt werden kann, das die Durchführung der Kontrolle im gesetzlich angeordneten Umfang bescheinigt. Die Ersetzbarkeit der Überprüfung durch ein Testat ist gesetzlich festzuschreiben.

Gegenstand des Testats ist die gesetzlich geforderte Überprüfung des Auftragnehmers durch den Auftraggeber anhand eines standardisierten Anforderungskatalogs.

Die Prüfkriterien für die Erteilung des Testats sind auf gesetzlicher Grundlage für den europäischen Binnenmarkt einheitlich festzusetzen. Die Festlegung der Prüfkriterien sollte durch ein Verfahren erfolgen, in dem Datenschutzbehörden sowie Vertreter von Anbietern und Nutzern der Auftragsdatenverarbeitung beteiligt werden.

Das Testat sollte (auch) durch qualifizierte private Stellen vergeben werden. Die Eignung der testierenden Stelle sollte durch eine Akkreditierung nachgewiesen werden. Die testierende Stelle sollte für fehlerhafte Testate haften.

Die Voraussetzungen der Akkreditierung von testierenden Stellen sollten in einem Verfahren von Vertretern der Datenschutzaufsichtsbehörden und Vertretern der Auftraggeber und Auftragnehmer von Auftragsdatenverarbeitung festgelegt werden. Die Akkreditierung sollte für den gesamten Geltungsbereich der EU-Datenschutz-Grundverordnung gelten.

Die Akkreditierung sollte durch geeignete, insbesondere fachlich qualifizierte und unabhängige Stellen erfolgen. Die EU-Datenschutz-Grundverordnung sollte die Anforderungen an die Akkreditierungsstellen im Grundsatz regeln, die Benennung der Akkreditierungsstellen den Mitgliedstaaten überlassen.“

Die AG-Rechtsrahmen hat aktuelle Publikationen zum Thema herausgegeben:

[http://trusted-cloud.de/media/content/140228\\_Thesenpapier\\_Datenschutz\\_gesamt\\_RZ.pdf](http://trusted-cloud.de/media/content/140228_Thesenpapier_Datenschutz_gesamt_RZ.pdf) ;  
geprüft 15.12.2014.

Im Gesundheitswesen werden vom BMWi derzeit drei Projekte gefördert.

#### **1.17.5 BSI zum Cloud Computing**

Vorabversion des IT-Grundschutz-Bausteins „Cloud Management“.

[https://www.bsi.bund.de/DE/Themen/ITGrundschutz/ITGrundschutzKataloge/Download/download\\_node.html;jsessionid=8DA304A2D7D532878297E28767178F82.2\\_cid294](https://www.bsi.bund.de/DE/Themen/ITGrundschutz/ITGrundschutzKataloge/Download/download_node.html;jsessionid=8DA304A2D7D532878297E28767178F82.2_cid294); geprüft  
15.12.2014.

Weitere interessante links zum Datenschutz

Datenschutz Mecklenburg-Vorpommern

<https://www.datenschutz-mv.de/datenschutz/publikationen/download.html>, geprüft  
15.12.2014.

<http://www.tmf-ev.de/News/articleType/ArticleView/articleId/1628.aspx>; geprüft 15.12.2014.

### 1.17.6 Smartphones

Bundesamt für Sicherheit in der Informationstechnik: Überblick Smartphones

[https://www.bsi.bund.de/SharedDocs/Downloads/DE/BSI/Grundschutz/Download/Ueberblickspapier\\_Smartphone\\_pdf.pdf?\\_\\_blob=publicationFile](https://www.bsi.bund.de/SharedDocs/Downloads/DE/BSI/Grundschutz/Download/Ueberblickspapier_Smartphone_pdf.pdf?__blob=publicationFile); geprüft 15.12.2014.

<http://www.it-administrator.de/themen/sicherheit/135703.html>; ; geprüft 15.12.2014.

Artikel:

Boulos MNK et al. (2011) How smartphones are changing the face of mobile and participatory healthcare: an overview, with example from eCAALYX BioMedical Engineering OnLine 2011, 10:24;

<http://www.biomedical-engineering-online.com/content/10/1/24>; geprüft 15.12.2014.

Prescher S et al. (2012) A Ubiquitous Ambient Assisted Living Solution to Promote Safer Independent Living in Older Adults Suffering from Co-morbidity. 34th Annual International Conference of the IEEE EMBS. San Diego

### 1.17.7 Apps

Insbesondere für Health- Apps, aber auch für Cloud-Dienste und Netzwerkdienste ist wichtig:

**Definition:** Personenbezogene Daten nach §3 Abs 1 BDSG sind alle Daten, die eine direkte oder indirekte Identifizierung (IP-Adresse, Geräte- und Kartenkennungen, Name des Geräts, Standortdaten, biometrische Daten, Profile,...) erlauben.

Die verantwortliche Stelle im Sinne des Datenschutzes ist in der Regel der Anbieter.

Grundsätzlich gilt für die Erhebung personenbezogener Daten ein Verbot mit Erlaubnisvorbehalt. Entsprechend §4 Abs 2 BDSG (Direkterhebung) werden in der Regel Daten durch den Patient selbst oder mit Mitwirkung eines Dritten erhoben. Eine freiwillige Einwilligung nach Aufklärung gemäß §12 Abs 1 TMG, §4a BDSG muss deshalb grundsätzlich vorliegen und sollte bei einer Health-App als Benutzungsanforderung ausgestaltet sein. Heimliches sammeln von Daten, Profilen etc. ist verboten! Im übrigen sollten hohe Sicherheitsstandards für Nutzung und Datenübertragung eingehalten werden. Dazu gehören: Eine zwei-Faktor Authentifizierung, eine kryptographische Verschlüsselung gespeicherter Daten, eine Transportverschlüsselung (TLS1.1 oder höher), eine sichere Verbindung, und die Löschung aller personenbezogenen Daten spätestens bei Deinstallation. Zur Vermeidung von Angriffen durch Unterschieben von Zertifikaten sollte ein Zertifikats- und Public Key Pinning erfolgen.

Für Provider und andere Dienstleister gelten außerhalb der EU die Übermittlungsvorschriften des BDSG, innerhalb der EU handelt es sich um Auftragsdatenverarbeitung §1 BDSG in V. m. §11 BDSG.

Baden-Württemberg hat eine besonders fortschrittliche Regelung für Provider:

<http://www.landesrecht-bw.de/jportal/?quelle=jlink&query=KHG+BW&psml=bsbawueprod.psml&max=true&aiz=true> ;  
geprüft 15.12.2014.

Entwicklungsumgebungen:

<http://developer.android.com/about/index.html>; geprüft 15.12.2014.

<https://developer.apple.com/ios8/>; geprüft 15.12.2014.

Artikel

Gill PS et al. (2012) Distraction: an assessment of smartphone usage in health care work settings

<http://www.dovepress.com/distraction-an-assessment-of-smartphone-usage-in-health-care-work-sett-peer-reviewed-article-RMHP> ; geprüft 15.12.2014

Problem Privatsphäre:

<https://www.privacyrights.org/mobile-health-and-fitness-apps-what-are-privacy-risks> ;  
geprüft 15.12.2014.

<https://www.privacyrights.org/mobile-medical-apps-privacy-technologist-research-report.pdf> ;  
geprüft 15.12.2014.

[http://www.pcwelt.de/ratgeber/Android\\_endlich\\_abhoersicher\\_\\_so\\_geht\\_s-Android\\_verschluesseln-8257390.html](http://www.pcwelt.de/ratgeber/Android_endlich_abhoersicher__so_geht_s-Android_verschluesseln-8257390.html) ; geprüft 15.12.2014.

Die Telemed 2012 war den Apps gewidmet

<http://www.telemed-berlin.de/archiv/telemed2012/programm-2012-download> ; geprüft  
15.12.2014. In mehreren Sitzungen wurden Anwendungsbeispiele vorgestellt.

Review Apps für Diabetiker 2012:

Årsand E et al.(2012) Mobile Health Applications to Assist Patients with Diabetes: Lessons Learned and Design Implications. Journal of Diabetes Sci Technol; 6:1197-1206;

<http://www.ncbi.nlm.nih.gov/pmc/articles/PMC3570855/pdf/dst-06-1197.pdf> ; geprüft  
15.12.2014.

Die Ziele der Diabetes-Behandlung lassen sich nur erreichen, wenn die Patienten ihr eigenes Verhalten entsprechend gestalten. Smartphones und Vernetzung können ein sinnvoller Baustein im Diseasemanagementprozess sein. Für ältere chronisch kranke Menschen müssen aber die technischen Hürden niedrig sein. Insbesondere der Bedienaufwand bei Nutzung von Apps muss sich auf wenige „Touches“ beschränken. Deshalb eignen sich automatische Übertragungen von Blutzuckerwerten oder anderen Messgeräten wie Pedometern gut. Detaillierte Information zur Ernährung sind hingegen oft zu komplex. Besser sind einfache Hilfestellungen mit klaren Signalen z. B. als Ampel. Für motivierte technisch versierte Benutzer kommen auch anspruchsvollere Tools bis zur Modelbildung in Frag.

Die Einflussgrößen auf Technologieakzeptanz (Zu den Einflussfaktoren gehören unter anderem soziodemographische Merkmale, (Aus)bildung, individueller Gesundheitszustand und vorhandene Erfahrung im Umgang mit innovativen Technologien.), insbesondere bei älteren Menschen, sind äußerst vielfältig. Der Frage: Wie muss eine mobile Applikation gestaltet sein, um Diabetespatienten 50+ effektiv beim Selbstmanagement ihrer Diabeteserkrankung zu unterstützen? widmete sich ein Vortrag auf der Telemed 2013, der eine systematische Marktanalyse beinhaltete, wobei besonders auffällig die unzureichende Gebrauchstauglichkeit für ältere Patienten auffiel: Arnhold M. et al. (2013) Entwicklung einer anwendergerechten Applikation für Diabetespatienten 50+. Vortrag Telemed 2013.

<http://www.telemed-berlin.de/telemed2013/programm-mit-download-der-vortraege> ; geprüft 15.12.2014.

Auf der Telemed 2012 wurde von der ZTG (Zentrum für Telematik im Gesundheitswesen GmbH) ein Konzept zur Aufbau einer Bewertungs- und Qualitätsplattform (Zertifizierung) für Health-Apps vorgestellt: <sup>1</sup>

[http://www.telemed-berlin.de/telemed/2012/vortrag/vortrag\\_reiss462\\_491.pdf](http://www.telemed-berlin.de/telemed/2012/vortrag/vortrag_reiss462_491.pdf) ; geprüft 15.12.2014.

D4 ist eine britische gemeinnützige Organisation, die sich der Unterstützung der Anwendung medizinischer Apps verschrieben hat und mit „*Regulation of health apps: a practical guide*“ eine lesenswerte grundlegende Einführung ins Thema mit Beispielen bringt.

<http://www.d4.org.uk/research/regulation-of-health-apps-a-practical-guide-January-2012.pdf> ; geprüft 15.12.2014.

### **1.17.8 Teleradiologie**

Die Teleradiologie ist eine weltweit etablierte Anwendung. In Deutschland ist sie teilweise durch Röntgenverordnung (RöV) geregelt:

[http://www.gesetze-im-internet.de/r\\_v\\_1987/\\_2.html](http://www.gesetze-im-internet.de/r_v_1987/_2.html) ; geprüft 15.12.2014.

Neben der klassischen Radiologie nach RöV gibt es radiologische Konsile, Zweitmeinungen etc.

Die Europäische Gesellschaft für Radiologie

[https://www.myesr.org/cms/website.php?id=/en/about/esr\\_ecr.htm](https://www.myesr.org/cms/website.php?id=/en/about/esr_ecr.htm); geprüft 15.12.2014.

hat 2014 ein White Paper zur Teleradiologie veröffentlicht.

<http://link.springer.com/content/pdf/10.1007%2Fs13244-013-0307-z.pdf>; geprüft 15.12.2014.

Das American College of Radiology (ACR) hat ebenfalls ein aktuelles Whitepaper zum Thema veröffentlicht, das auch technische Empfehlungen enthält:

Silva et al. ACR white paper on teleradiology practice: a report from the Task Force on Teleradiology Practice. J Am Coll Radiol. 2013 Aug;10(8):575-85. doi: 10.1016/j.jacr.2013.03.018. geprüft 15.12.2014.

**Nighthawk services** ist ein weltweiter 24-Stunden Teleradiologiedienst.

<https://www.nighthawkradiology.com/> ; geprüft 15.12. 2014

Siehe auch folgendes aktuelles Review zur Teleradiologie:

Krupinski EA. Teleradiology: current perspectives. Dovepress. Reports in Medical Imaging

2014;7 5–14 : <http://dx.doi.org/10.2147/RMIS48140> ; geprüft 15.12. 2014

### 1.17.9 Telenotfallmedizin

Die deutsche Gesellschaft für Unfallchirurgie betreibt ein Traumanetzwerk zur optimalen Notfallversorgung.

[http://www.dgu-traumanetzwerk.de/index.php?option=com\\_content&view=article&id=48&Itemid=55&lang=de](http://www.dgu-traumanetzwerk.de/index.php?option=com_content&view=article&id=48&Itemid=55&lang=de);  
geprüft 15.12. 2014

Das auf der Telemed 2013 vorgestellte **Projekt TKmed** ist eine praxisorientierte Telekooperationsplattform für die Versorgung von Schwerverletzten:

[http://www.telemed-berlin.de/telemed/2013/beitrag/beitrag\\_staemmler278\\_527.pdf](http://www.telemed-berlin.de/telemed/2013/beitrag/beitrag_staemmler278_527.pdf) ; geprüft 15.12. 2014

Die Plattform bietet eine zentrale Infrastruktur mit drei an den Bedarf angepassten Funktionsstufen und innovativem Sicherheitskonzept. Im Vergleich zu aktenbezogenen Lösungen wie elektronische Patientenakte (ePA), Infrastrukturdiensten (XDS von IHE) und den Mehrwertdiensten der eGK benötigt TKmed *keine* Vergabe von Zugriffsrechten und Masterpatientindex. Unter den Gesichtspunkten der Datensparsamkeit und der Effizienz ist die TKmed Lösung der ePA überlegen.

Projekt **TemRas**: Unterstützung des Telenotarztes in 280 von 401 ausgewerteten Fällen ausreichend, darüber hinaus in 34 Fällen Notarzt nachalarmiert, in 52 Fällen übernimmt der Telenotarzt die Transportbegleitung und der Notarzt war schneller wieder einsatzbereit

Anmerkungen vom Deutschen Anästhesie Kongress 2014

<http://www.juraforum.de/wissenschaft/telenotarzt-diagnose-per-live-uebertragung-steigert-qualitaet-der-patientenversorgung-478949> ; geprüft 15.12. 2014

### 1.17.10 Telemonitoring-Projekte

In Deutschland und weltweit werden Infrastruktur und Dienstleistungen für Telemonitoring auch von anderen auf dem Sektor spezialisierten Betreibern angeboten,

Vitaphone unter dem Motto, *Vernetzt denken – kompetent gemeinsam handeln*

[www.vitaphone.de/](http://www.vitaphone.de/); geprüft 15.12. 2014

GETEMED:

[www.getemed.net/](http://www.getemed.net/); geprüft 15.12. 2014

Aber auch große Firmen aus der Monitor-und Medizintechnikbranche, wie Philips und alle großen Schrittmacherhersteller stellen entsprechende Dienste bereit.

Philips Motiva, z.B., ist eine interaktive telemedizinische Gesundheitsplattform.

[http://www.healthcare.philips.com/main/homehealth/home\\_monitoring/](http://www.healthcare.philips.com/main/homehealth/home_monitoring/) ; geprüft 15.12. 2014

In Deutschland gibt es viele regionale Projekte in Kooperation mit entsprechenden Dienstleistern. Besonders viele befassen sich mit Herzinsuffizienz einerseits wegen der epidemiologischen Bedeutung des Problems andererseits deshalb, weil die oft vorhandenen intelligenten Implantate (Schrittmacher, Defibrillatoren, Resynchronisationssysteme..) telemetrisch wichtige Vitaldaten liefern.

#### Literatur:

Anker SD et al. (2011) Telemedicine and remote management of patients with heart failure. The Lancet, Vol. 378 No. 9792 pp 731-739.

Hasan A et al. Telemonitoring in chronic heart failure. European Heart Journal (2011) 32, 1457–1464

Die Empfehlung zum Telemonitoring hat Eingang in einschlägige medizinische Guidelines in Europa und USA gefunden:

Yancy CW, Jessup M, Bozkurt B, et al. 2013 ACCF/AHA guideline for the management of heart failure: a report of the American College of Cardiology Foundation/American Heart Association Task Force on Practice Guidelines. Circulation. 2013;128:1810–1852

McMurray JJ, Adamopoulos S, Anker SD, et al. ESC Guidelines for the diagnosis and treatment of acute and chronic heart failure 2012: The Task Force for the Diagnosis and Treatment of Acute and Chronic Heart Failure 2012 of the European Society of Cardiology. Developed in collaboration with the Heart Failure Association (HFA) of the ESC. Eur Heart J. 2012;33:1787–1847.

#### Metaanalysen und Übersichtsarbeiten:

Inglis SC et al. (2011) Which components of heart failure programmes are effective? A systematic review and meta-analysis of the outcomes of structured telephone support or telemonitoring as the primary component of chronic heart failure management in 8323 patients: Abridged Cochrane Review. Eur J Heart Fail. 2011 Sep;13(9):1028-40. doi: 10.1093/eurjhf/hfr039.

Pandor A. et al. (2013) Remote monitoring after recent hospital discharge in patients with heart failure: a systematic review and network meta-analysis. Heart. 2013 Dec;99(23):1717-26. doi: 10.1136/heartjnl-2013-303811

Conway A. et al. (2013) Not all systematic reviews are systematic: a meta-review of the quality of systematic reviews for non-invasive remote monitoring in heart failure. J Telemed Telecare. 2013 Sep;19(6):326-37. doi: 10.1177/1357633X13503427

<http://www.dovepress.com/role-of-telephone-monitoring-in-patients-with-chronic-heart-failure-th-peer-reviewed-article-SHTT>; geprüft 15.12. 2014



Auf der Telemed 2013 wurde das E.He.R Projekt aus Rheinland-Pfalz vorgestellt, das in Kooperation mit der Vitaphone GmbH durchgeführt wird.  
[http://www.telemed-berlin.de/telemed/2013/beitrag/beitrag\\_budych317\\_513.pdf](http://www.telemed-berlin.de/telemed/2013/beitrag/beitrag_budych317_513.pdf) ; geprüft 15.12. 2014

Neben der Herzinsuffizienz gibt es natürlich auch andere epidemiologisch bedeutende Erkrankungen mit Therapie- und Verlaufsüberwachungsbedarf.  
<http://www.dovepress.com/the-use-of-telephone-monitoring-for-diabetic-patients-theory-and-pract-peer-reviewed-article-SHTT>; geprüft 15.12. 2014

### **Ambient Assisted Living (AAL)**

AAL beschreibt technische Maßnahmen und Dienste zur Unterstützung von (älteren, behinderten oder kranken...) Menschen in häuslicher Umgebung.

Portal „Alter und Technik“

<https://www.wegweiseralterundtechnik.de/index.php/Hauptseite>; geprüft 15.12. 2014

Das von der Europäischen Union geförderte Projekt EHxAAL in Niedersachsen bietet Beratung, Planung und Baubegleitung für altersgerechtes Wohnen in Kooperation mit dem örtlichen Handwerk

<http://geniaal-beraten.de/beratungszentrum/unsere-leistungen/>; geprüft 15.12. 2014

---

### **Weiterführende Literatur:**

*Bartman FJ et al. Hrsg. (2012). Telemedizinische Methoden in der Patientenversorgung- Anwendungsspektrum, Chancen und Risiken. Reihe Report Versorgungsforschung, Hrsg. Fuchs C. et al., Deutscher Ärzteverlag, Köln. ISBN 978-3-7691-3494-0*

*Topol E. (2012) The Creative Destruction of Medicine. Basic Books, New York. ISBN 978-0-465-02550-3*

*Siebenhüner. Wartung technischer Systeme im Krankenhaus durch externe Dienstleister/Datenschutzrechtliche Aspekte. 1. Auflage, 2013; Deutsche Krankenhaus Verlagsgesellschaft mbH. ISBN-13: 978-3-942734-49-3*

Krüger-Brand H. (2013) Telemedizin: Problem der Infrastruktur Dtsch Arztebl; 110(14): [10]  
<http://www.aerzteblatt.de/archiv/136873/Telemedizin-Problem-der-Infrastruktur>; geprüft 15.12. 2014

*Andrea Hauser, Ina Haag. Datenschutz im Krankenhaus. 4. Auflage, 2012. Deutsche Krankenhaus Verlagsgesellschaft mbH. ISBN-13: 978-3-942734-25-7*

*Katzenmeier C. et al.. Rechtsfragen des Einsatzes der Telemedizin im Rettungsdienst: Eine Untersuchung am Beispiel des Forschungsprojektes Med-on-@ix. 2010. Springer, Heidelberg*

Empfehlungen zur ärztlichen Schweigepflicht, Datenschutz und Datenverarbeitung in der Arztpraxis <http://www.bundesaerztekammer.de/page.asp?his=0.7.47.6188>;  
[http://www.bundesaerztekammer.de/downloads/Empfehlung\\_Schweigepflicht\\_Datenschutz.pdf](http://www.bundesaerztekammer.de/downloads/Empfehlung_Schweigepflicht_Datenschutz.pdf); geprüft 15.12. 2014

Vorabversion des IT-Grundschutz-Bausteins "Cloud Management".  
[https://www.bsi.bund.de/DE/Themen/ITGrundschutz/ITGrundschutzKataloge/Download/download\\_ad\\_node.html;jsessionid=8DA304A2D7D532878297E28767178F82.2\\_cid294](https://www.bsi.bund.de/DE/Themen/ITGrundschutz/ITGrundschutzKataloge/Download/download_ad_node.html;jsessionid=8DA304A2D7D532878297E28767178F82.2_cid294); geprüft 15.12. 2014

Bundesamt für Sicherheit in der Informationstechnik: Überblick Smartphones  
[https://www.bsi.bund.de/SharedDocs/Downloads/DE/BSI/Grundschutz/Download/Ueberblickspieler\\_Smartphone\\_pdf.pdf?\\_\\_blob=publicationFile](https://www.bsi.bund.de/SharedDocs/Downloads/DE/BSI/Grundschutz/Download/Ueberblickspieler_Smartphone_pdf.pdf?__blob=publicationFile); geprüft 15.12. 2014

Silva BM et al. (2013) A data encryption solution for mobile health apps in cooperation environments. *J Med Internet Res.* 2013 Apr 25;15(4):e66. doi: 10.2196/jmir.2498.  
<http://www.ncbi.nlm.nih.gov/pmc/articles/PMC3636327/?report=printable>; geprüft 15.12. 2014

Schnabel Patrick. Kommunikationstechnik-Fibel:  
<http://www.kommunikationstechnik-fibel.de/>; geprüft 15.12. 2014

Hughes L. et al. (2012) A Review of Protocol Implementations and Energy Efficient Cross-Layer Design for Wireless Body Area Networks. *Sensors*, 12, 14730-14773; doi:10.3390/s121114730;  
<http://www.ncbi.nlm.nih.gov/pmc/articles/PMC3522938/pdf/sensors-12-14730.pdf>; geprüft 15.12. 2014

Patel S et al. (2012). A review of wearable sensors and systems with application in rehabilitation. *Journal of NeuroEngineering and Rehabilitation*, 9:21;  
<http://www.ncbi.nlm.nih.gov/pmc/articles/PMC3354997/pdf/1743-0003-9-21.pdf>; geprüft 15.12. 2014

Kumar P et al. (2012) Security Issues in Healthcare Applications Using Wireless Medical Sensor Networks: A Survey. *Sensors* 2012, 12, 55-91; doi:10.3390/s12010055;  
<http://www.ncbi.nlm.nih.gov/pmc/articles/PMC3279202/pdf/sensors-12-00055.pdf>; geprüft 15.12. 2014

Kumar P et al. (2012) E-SAP: Efficient-Strong Authentication Protocol for Healthcare Applications Using Wireless Medical Sensor Networks. *Sensors*, 12, 1625-1647; doi:10.3390/s120201625.  
<http://www.ncbi.nlm.nih.gov/pmc/articles/PMC3304131/pdf/sensors-12-01625.pdf>; geprüft 15.12. 2014

Sahoo PK (2012) Efficient Security Mechanisms for mHealth Applications Using Wireless Body Sensor Networks. *Sensors*, 12, 12606-12633; doi:10.3390/s120912606.  
<http://www.ncbi.nlm.nih.gov/pmc/articles/PMC3478861/pdf/sensors-12-12606.pdf>; geprüft 15.12. 2014

Saleem S. et al. (2011) A Study of IEEE 802.15.4 Security Framework for Wireless Body Area Networks. *Sensors*, 11, 1383-1395; doi:10.3390/s110201383;

<http://www.ncbi.nlm.nih.gov/pmc/articles/PMC3274043/pdf/sensors-11-01383.pdf> ; geprüft  
15.12. 2014

*Sarasohn-Kahn J (2010). How smartphones are changing health care for consumers and providers  
Oakland, CA: California HealthCare Foundation;*

<http://www.chcf.org/publications/2010/04/how-smartphones-are-changing-health-care-for-consumers-and-providers> ; 15.12. 2014

*Van Velsen L. et al. (2013) Why mobile health app overload drives us crazy, and how to restore the  
sanity. BMC Med Inform Decis Mak. doi: 10.1186/1472-6947-13-23;*

<http://www.ncbi.nlm.nih.gov/pmc/articles/PMC3621678/pdf/1472-6947-13-23.pdf> ; 15.12.  
2014

*Gersch M/Liesenfeld J (Hrsg.)(2012) AAL- und E-Health Geschäftsmodelle Technologie und  
Dienstleistungen im demographischen Wandel und in sich verändernden  
Wertschöpfungsarchitekturen. Gabler Verlag Springer Wiesbaden. ISBN 978-3-8349-3520-5*

*Haas P et al. (Hrsg.)(2013) Telemed 2013 Tagungsband. Nutzung, Nutzer, Nutzen von Telematik in  
der Gesundheitsversorgung eine Standortbestimmung. 18. Nationales Forum für  
Gesundheitstelematik und Telemedizin. TMF Berlin. ISBN 978-3-9814060-1-6*

*Semler SC et al. (Hrsg.)(2014) Telemed 2014 Tagungsband. Dokumentation und Archivierung,  
Haftungsfragen und Patientenrechte in der Telemedizin. 19. Nationales Forum für  
Gesundheitstelematik und Telemedizin. TMF Berlin. ISBN 978-3-89838-699-9*
